# Supplementary material
Source: MDPI journal article supplement (https://www.mdpi.com/2673-964X/4/1/11)
Supplement: s1 [file s1]

Supplementary Materials

Use of eDNA to Determine Source Locations of Deadly Jellyfish (Cubozoa) in a Tourism Hotspot

Scott J. Morrissey <sup>1,2,\*</sup>, Dean R. Jerry <sup>1,3,4</sup> and Michael J. Kingsford <sup>1,2</sup>

<sup>1</sup> College of Science and Engineering, James Cook University, Bebegu Yumba campus, Townsville, QLD, 4814, Australia

<sup>2</sup> ARC Centre of Excellence for Coral Reef Studies, Bebegu Yumba campus, Townsville, QLD, 4814, Australia

<sup>3</sup> Tropical Futures Institute, James Cook University, Singapore, 387380, Singapore

<sup>4</sup> ARC Research Hub for Supercharging Tropical Aquaculture through Genetic Solutions, Bebegu Yumba campus, Townsville, QLD, 4818, Australia

\* Corresponding author. Email: scott.morrissey@my.jcu.edu.au

**Table S1.** Species-specific *Chironex fleckeri* and generic fish endogenous control assay information (adapted from Morrissey et al. (2022)).

| Assay                                          | Label               | Sequence (5' – 3')                   | Reference                  |
|------------------------------------------------|---------------------|--------------------------------------|----------------------------|
| <i>Chironex fleckeri</i><br>(species-specific) | Forward             | ATCTTCCACTGTCTCAGCTTTACC             | Morrissey et al.<br>(2022) |
|                                                | Reverse             | CCTCAGTACTCGTGTCTCCCTA               |                            |
|                                                | TaqMan MGB<br>Probe | (FAM)-CTCGTCCTTCCAAGTATAAG-<br>(MGB) |                            |
| Generic fish -<br>Endogenous<br>Control        | Forward             | GACCTCGATGTTGGATCA                   | Furlan &<br>Gleeson (2016) |
|                                                | Reverse             | CTCAGATCACGTAGGACTTTA                |                            |
|                                                | TaqMan MGB<br>Probe | (VIC)-ACATCCTAWTGGTGC-(MGB)          |                            |

**Table S2.** eDNA sample collection sites with depth, depth-integrated temperature and salinity, number of positive technical replicates and eDNA concentrations (copies L<sup>-1</sup>) during the December 2020 and February 2021 sampling periods.

| Sampling Time | Site no. | Depth (m) | Temperature (°C) | Salinity (ppt) | No. of positive detections / 12 | Copies per L |
|---------------|----------|-----------|------------------|----------------|---------------------------------|--------------|
| December 2020 | 5        | 2.5       | 29.5             | 36.2           | 1                               | 32           |
|               | 6        | 0.4       | 30.9             | 36.4           | 2                               | 45.8         |
|               | 16       | 2.2       | 29.5             | 36.2           | 5                               | 97.9         |
|               | 19       | 2.4       | 29.4             | 36.2           | 3                               | 275.6        |
|               | 22       | 1         | 31.1             | 36.2           | 0                               | 0            |
|               | 23       | 0.4       | 29               | 36.2           | 0                               | 0            |
| Average       | –        | –         | 29.9             | 36.2           | –                               | –            |
| February 2021 | 5        | 2.8       | 30.3             | 33.8           | 0                               | 0            |
|               | 6        | 2.1       | 29.9             | 32.4           | 2                               | 63.4         |
|               | 16       | 2.2       | 29.8             | 33.6           | 2                               | 36.5         |
|               | 19       | 3.1       | 30.3             | 33.8           | 2                               | 92.4         |
|               | 22       | 0.8       | 30.2             | 33.6           | 2                               | 17.8         |
|               | 23       | 0.7       | 30               | 33.4           | 1                               | 26.8         |
| Average       | –        | –         | 30.1             | 33.4           | –                               | –            |

**Table S3.** eDNA sample collection sites with depth (m), depth-integrated temperature and salinity, number of positive technical replicates and eDNA concentrations (copies L<sup>-1</sup>) during the March and December 2021 sampling periods. \* indicates sites where data were not collected.

| Sampling Time | Site no. | Depth (m) | Temperature (°C) | Salinity (ppt) | No. of positive detections / 12 | Copies per L |
|---------------|----------|-----------|------------------|----------------|---------------------------------|--------------|
| March 2021    | 1        | 8.1       | 28.1             | 32.8           | 0                               | 0            |
|               | 3        | 5.1       | 28.8             | 32.9           | 0                               | 0            |
|               | 5        | 0.5       | 29.5             | 32.8           | 0                               | 0            |
|               | 6        | 0.8       | 27.2             | 31.4           | 4                               | 134.8        |
|               | 14       | 10.7      | 28.4             | 32.9           | 0                               | 0            |
|               | 15       | 8.2       | 28.5             | 32.9           | 0                               | 0            |
|               | 16       | 1.4       | 29.6             | 31.4           | 3                               | 58.2         |
|               | 17       | 11.4      | 28.3             | 32.9           | 0                               | 0            |
|               | 18       | 8.9       | 28.6             | 32.9           | 0                               | 0            |
|               | 19       | 1.7       | *                | *              | 0                               | 0            |
|               | 20       | 11.2      | 28.3             | 32.9           | 0                               | 0            |
|               | 21       | 7.8       | 28.3             | 32.9           | 0                               | 0            |
|               | 22       | 1.2       | 27.9             | 32.8           | 0                               | 0            |
|               | 23       | 1.2       | 28.2             | 31.9           | 1                               | 18.8         |
| Average       | –        | –         | 28.4             | 32.6           | –                               | –            |
| December 2021 | 1        | 11.7      | 30               | 35.3           | 0                               | 0            |
|               | 3        | 8.8       | 30.1             | 35.2           | 0                               | 0            |
|               | 5        | 0.5       | 31.2             | 35.2           | 0                               | 0            |
|               | 6        | 0.4       | 30.2             | 35.5           | 1                               | 33.5         |
|               | 14       | 12.3      | 30.1             | 35.3           | 0                               | 0            |
|               | 15       | 8.9       | 30.1             | 35.2           | 0                               | 0            |
|               | 16       | 3         | 30.4             | 35.3           | 0                               | 0            |
|               | 17       | 11.8      | 30               | 35.2           | 0                               | 0            |
|               | 18       | 8.7       | 30.3             | 35.2           | 0                               | 0            |
|               | 19       | 4.2       | 30.6             | 35.3           | 0                               | 0            |
|               | 20       | 13        | 30.1             | 35.3           | 0                               | 0            |
|               | 21       | 8.1       | 30.2             | 35.3           | 0                               | 0            |
|               | 22       | 0.9       | 30.7             | 35.3           | 0                               | 0            |
|               | 23       | 0.4       | 30.6             | 35.3           | 1                               | 22.5         |
| Average       | –        | –         | 30.3             | 35.3           | –                               | –            |

**Table S4.** eDNA sample collection sites with depth (m), number of positive technical replicates and eDNA concentrations (copies L<sup>-1</sup>) during the July 2020 sampling period. Note, temperatures and salinities were not measured during that sampling period.

| Sampling Time | Site no. | No. of positive detections / 12 | Copies per L |
|---------------|----------|---------------------------------|--------------|
| July 2020     | 1        | 0                               | 0            |
|               | 3        | 1                               | 62.5         |
|               | 5        | 0                               | 0            |
|               | 6        | 1                               | 63.3         |
|               | 14       | 0                               | 0            |
|               | 15       | 0                               | 0            |
|               | 16       | 0                               | 0            |
|               | 17       | 0                               | 0            |
|               | 18       | 0                               | 0            |
|               | 19       | 0                               | 0            |
|               | 20       | 0                               | 0            |
|               | 21       | 0                               | 0            |
|               | 22       | 0                               | 0            |
|               | 23       | 0                               | 0            |

**Table S5.** eDNA sample collection sites with depth (m), depth-integrated temperature and salinity, number of positive technical replicates and eDNA concentrations (copies L<sup>-1</sup>) during the July 2022 sampling period. \* indicates sites where data were not collected.

| Sampling Time | Site no. | Depth (m) | Temperature (°C) | Salinity (ppt) | No. of positive detections / 12 | Copies per L |
|---------------|----------|-----------|------------------|----------------|---------------------------------|--------------|
| July 2022     | 2        | 0.5       | 20.3             | 34.3           | 0                               | 0            |
|               | 3        | 0.7       | 20.2             | 34.2           | 0                               | 0            |
|               | 4        | 0.3       | 21.2             | 34.1           | 0                               | 0            |
|               | 6        | 0.8       | 20.2             | 34.1           | 0                               | 0            |
|               | 7        | 0.4       | 21               | 34.3           | 0                               | 0            |
|               | 8        | 0.8       | 22.7             | 7.6            | 0                               | 0            |
|               | 10       | 0.8       | 20.5             | 2.5            | 0                               | 0            |
|               | 9        | 0.8       | 20.8             | 11.3           | 1                               | 73.6         |
|               | 11       | 0.8       | 20.5             | 2.5            | 0                               | 0            |
|               | 12       | 0.7       | 20.5             | 34.4           | 0                               | 0            |
|               | 13       | 1         | *                | *              | 0                               | 0            |
|               | 16       | 0.6       | 20.7             | 34.3           | 0                               | 0            |
|               | 19       | 0.6       | 21               | 34.2           | 0                               | 0            |
|               | 22       | 0.1       | *                | *              | 0                               | 0            |
|               | 23       | 0.4       | 20.2             | 34.2           | 2                               | 82.3         |
|               | 14       | 10.1      | 20               | 31.5           | 0                               | 0            |
| Average       | –        | –         | 20.7             | 25.96          | –                               | –            |

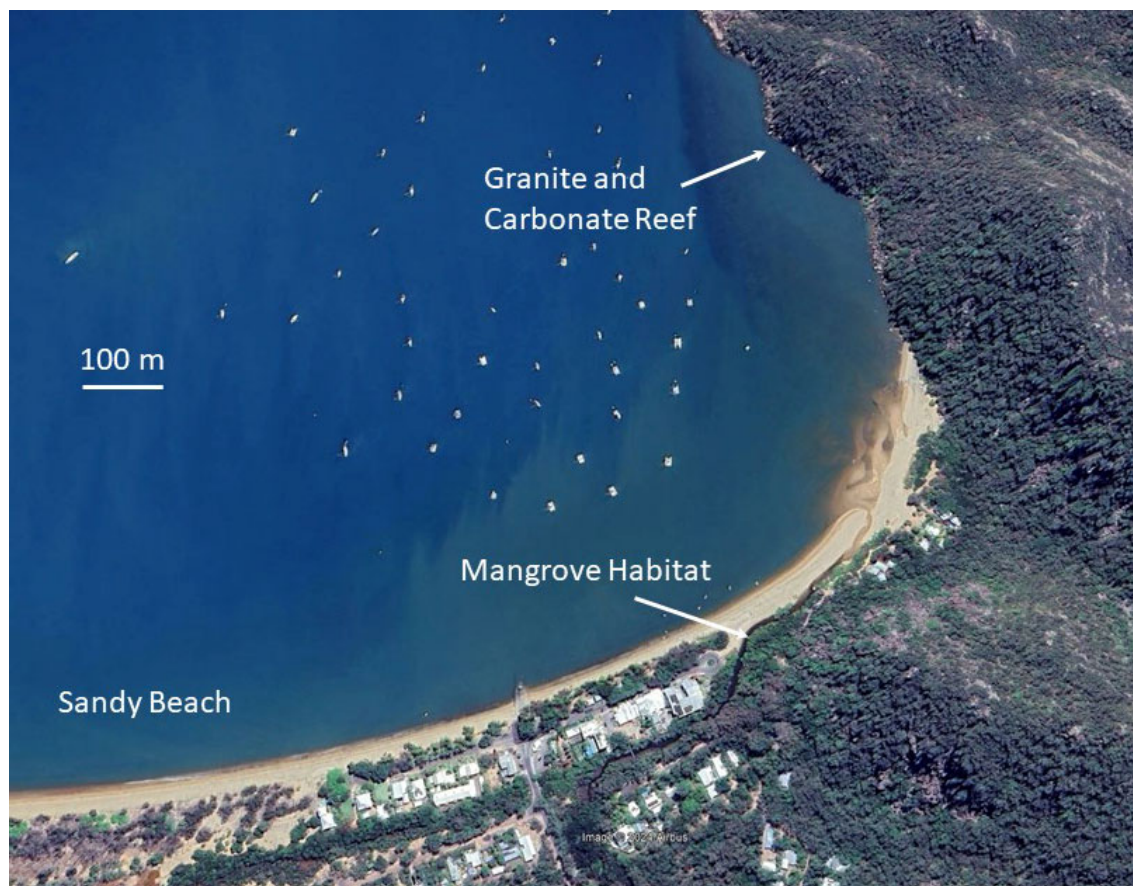

**Figure S1.** Labelled satellite image displaying the flora and landform of Horseshoe Bay, Magnetic Island.

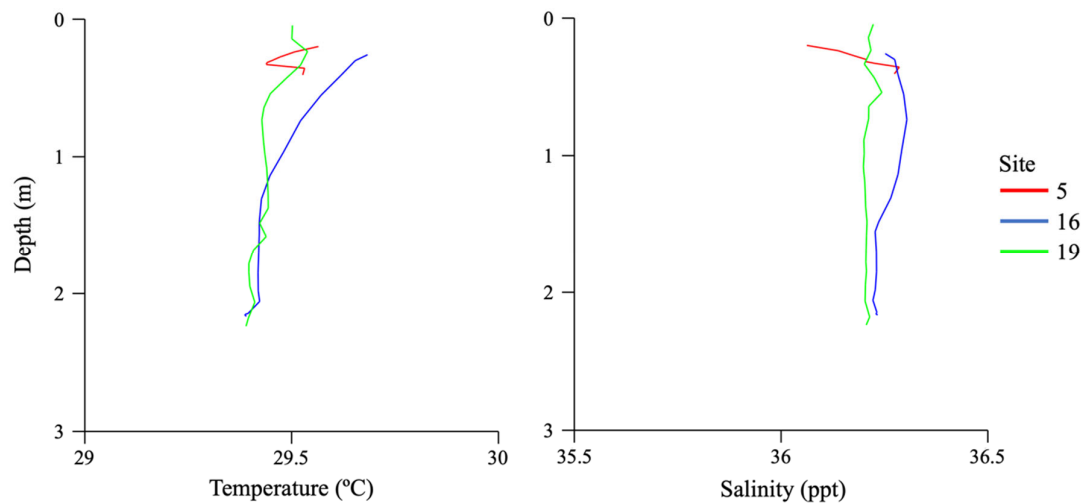

**Figure S2.** Depth profiles of temperature and salinity at nearshore sample sites for the December 2020 sampling time.

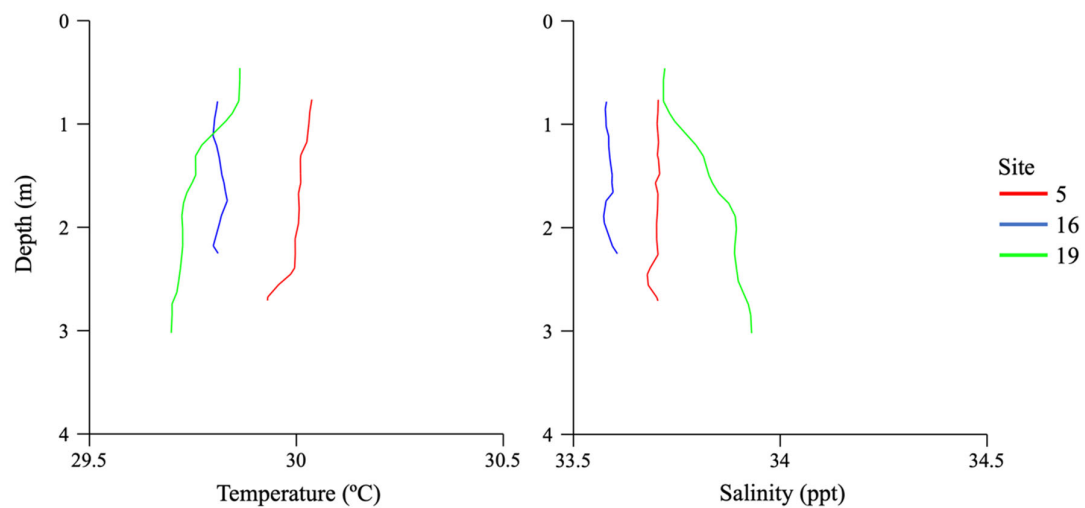

**Figure S3.** Depth profiles of temperature and salinity at nearshore sample sites for the February 2020 sampling time.

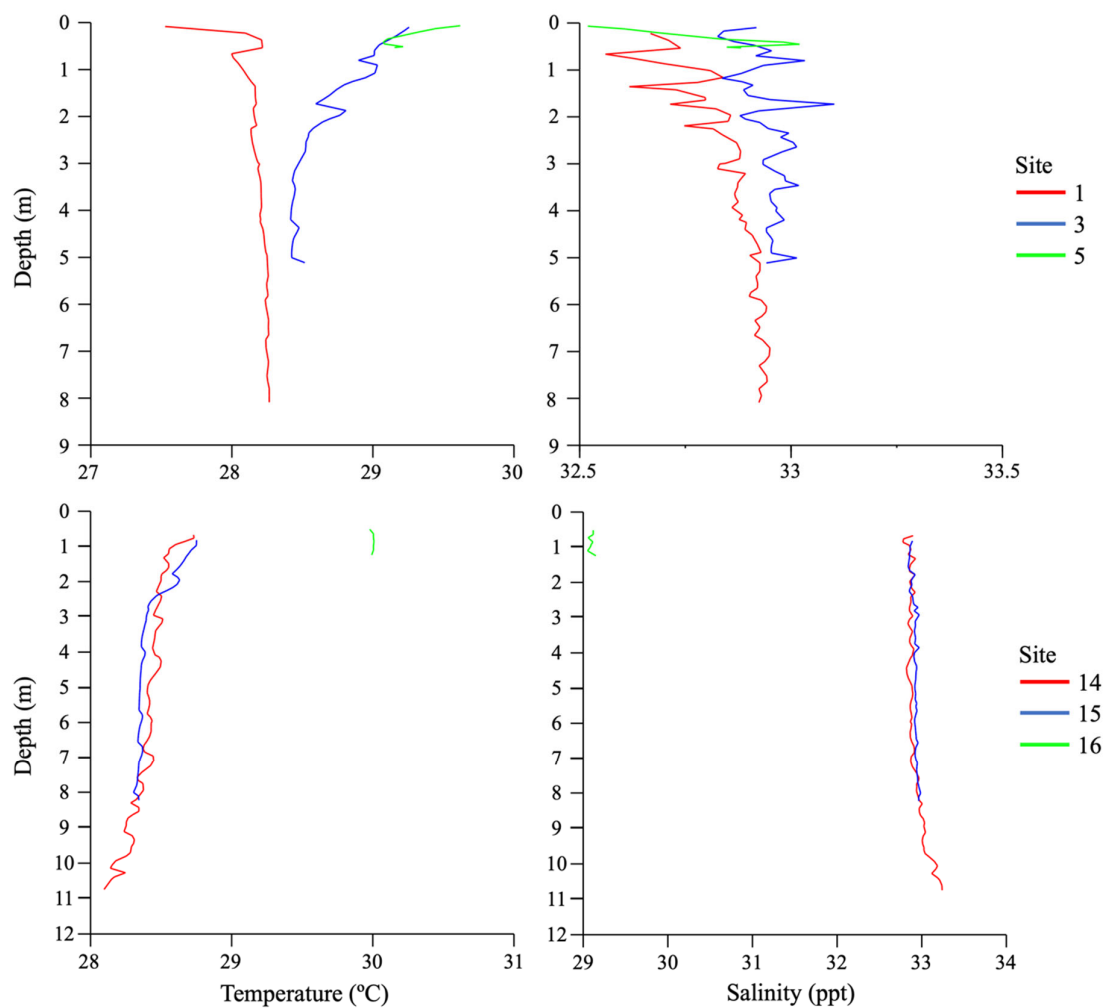

**Figure S4.** Depth profiles of temperature and salinity at offshore (sites 1 and 14), mid-shore (sites 3 and 15) and nearshore (sites 5 and 16) sample sites for the March 2021 sampling time.



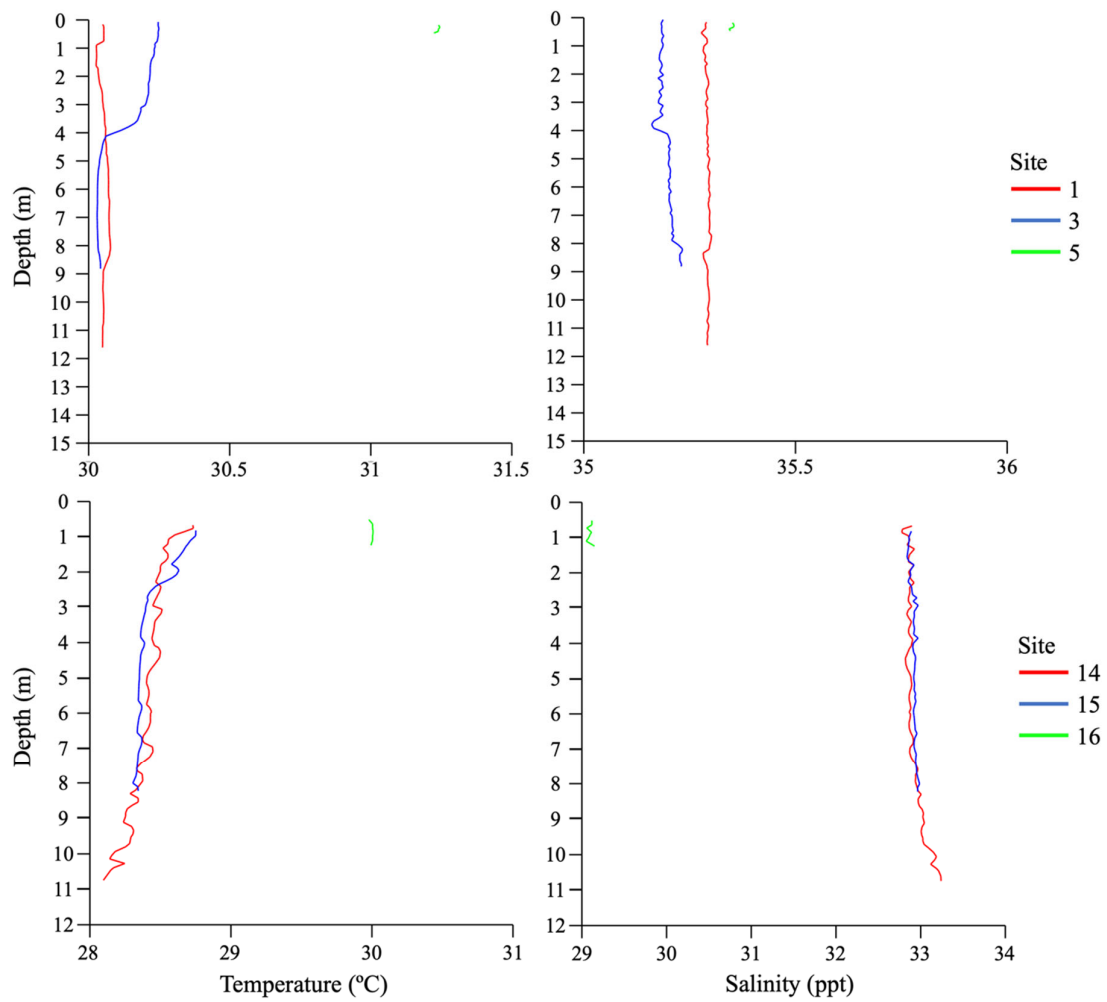

**Figure S5.** Depth profiles of temperature and salinity at offshore (sites 1 and 14), mid-shore (sites 3 and 15) and nearshore (sites 5 and 16) sample sites for the December 2021 sampling time.
